# Supplementary material for: Design rules for optimization of photophysical and kinetic properties of azoarene photoswitches
Source: Royal Society of Chemistry journal article supplement (doi:10.1039/d3ob01298k), 2023-01-01
Supplement: d3ob01298k1.pdf [file d3ob01298k1.pdf]

Supporting Information for:

Design rules for optimization of photophysical and kinetic properties of azoarene photoswitches

Authors list: Daniel M. Adrion Steven A. Lopez\*

Department of Chemistry and Chemical Biology, Northeastern University, Boston, Massachusetts, 02115, United States

The supporting information contains all optimized DFT files for all 26 *hemi*-azothiophenes presented in this paper. We present all optimized *E* and *Z* reactants, optimized transition structures, and the results from all intrinsic reaction coordinate (IRC) calculations. Output files and geometries are provided through Figshare at the following DOI:

<https://doi.org/10.6084/m9.figshare.22696471.v1>

Figure S1 shows transition state geometries for all 26 *hemi*-azothiophenes calculated in this paper.

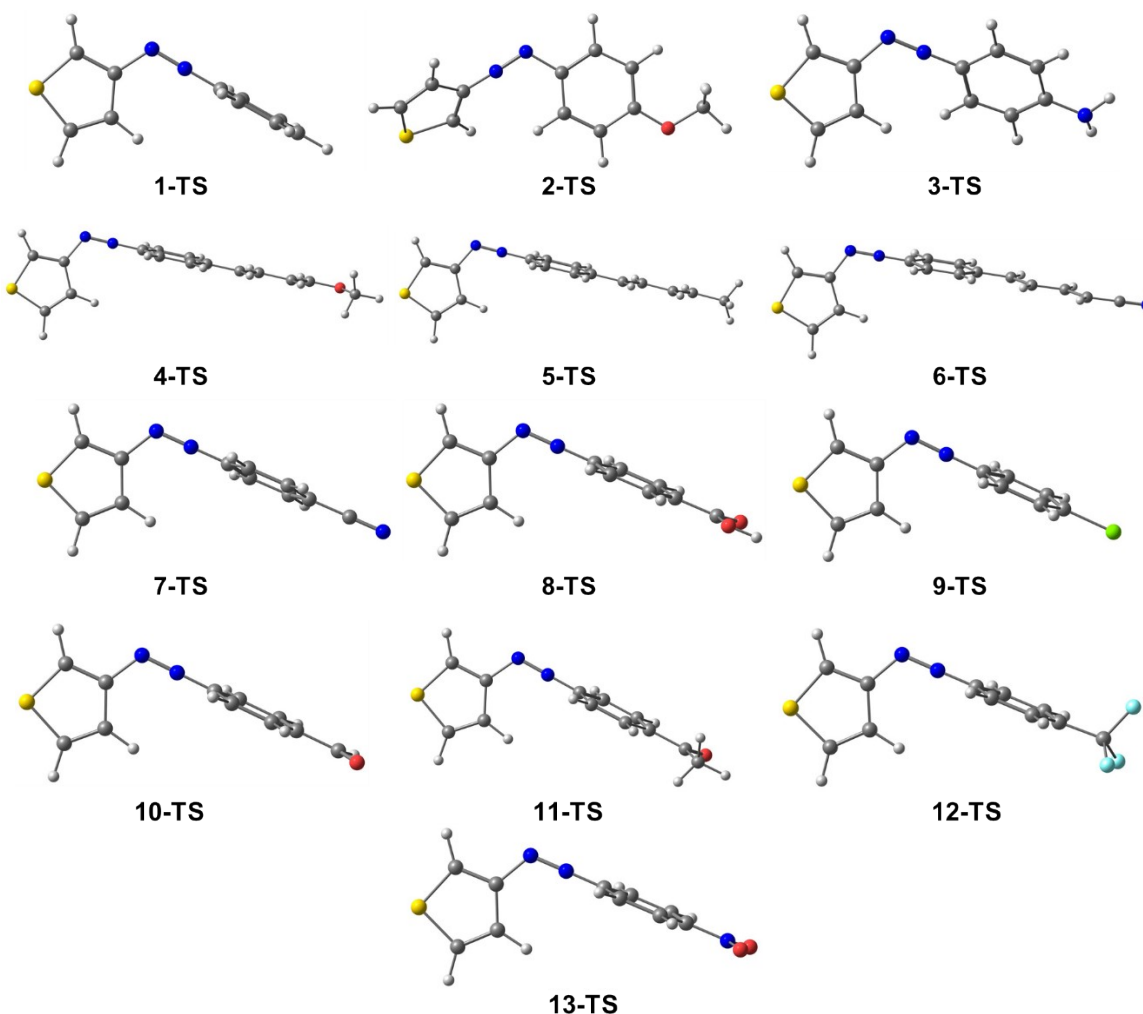

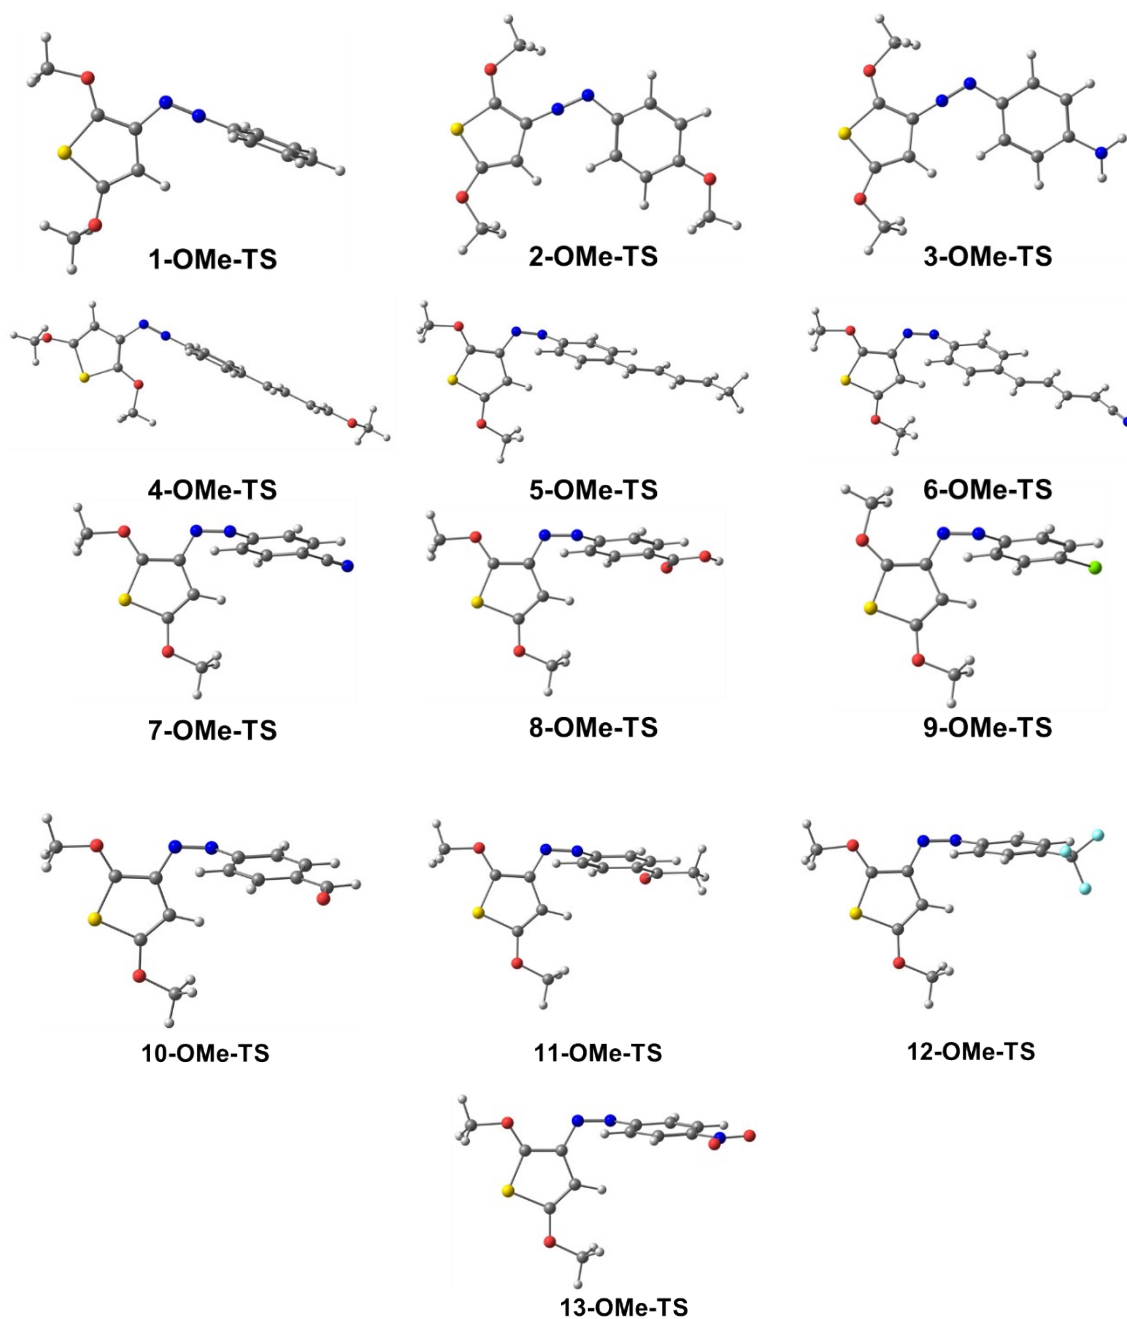

**Figure S1.** Transition state geometries for 26 *hemi-azothiophenes*.

Figure S1 shows all 26 *hemi-azothiophene* transition state geometries computed with PBE0-D3BJ/6-31+G(d,p) and IEFPCM<sup>water</sup>. In total, 17 *hemi-azothiophenes* isomerized through an inversion mechanism, and the remaining 9 isomerized through a rotation mechanism. All systems with unsubstituted thiophene rings undergo inversion, and four of the systems with dimethoxy-substituted thiophene rings also undergo inversion (1-OMe, 2-OMe, 3-OMe, and 4-OMe). We

note that methoxy-substituted structures that invert are all substituted with electron-donating groups (EDGs) at the phenyl ring *para* position. All dimethoxy-substituted *hemi*-azothiophenes with *para* electron-withdrawing groups (EWGs) on the phenyl ring undergo rotation.

### Calculation of $t_{1/2}$ with the Eyring equation

We computed the  $t_{1/2}$  lifetimes for all 26 *hemi*-azothiophenes presented in this manuscript by using the Eyring equation, which relates the free energy barrier for a given process ( $\Delta G^\ddagger$ ) to the rate constant  $k$ . We convert from  $k$  to  $t_{1/2}$  by using the following expression:

$$t_{1/2} = \frac{\ln(2)}{k}$$

Where  $t_{1/2}$  is the *Z*-isomer lifetime, and  $k$  is the rate constant for a given  $Z \rightarrow E$  isomerization reaction. We calculate the rate constant  $k$  by using the following form of the Eyring equation:

$$k = \frac{\kappa k_B T}{h} e^{-\frac{\Delta G^\ddagger}{RT}}$$

In the above equation,  $\kappa$  serves as the transmission coefficient, which is assumed to be equal to 1 for unimolecular processes.  $k_B$  is the Boltzmann constant,  $T$  serves as the temperature (room temperature for all calculations),  $h$  is Planck's constant, and  $R$  is the gas constant. We calculate  $k$  in units of  $s^{-1}$  and convert to  $t_{1/2}$  in units of seconds.
